1 **Analysis of the *Streptococcus mutans* proteome during acid and oxidative stress reveals**  
2 **modules of co-expression and an expanded role for the TreR transcriptional regulator**

3  
4 **Authors: Elizabeth L. Tinder<sup>1,†</sup>, Roberta C. Faustoferri<sup>2,†</sup>, Andrew A. Buckley<sup>3</sup>, Robert G.**  
5 **Quivey, Jr.<sup>2,4</sup>, Jonathon L. Baker<sup>5,6\*</sup>**

6  
7 <sup>1</sup>Department of Infectious Disease, St. Jude Children's Research Hospital, Memphis, TN

8 <sup>2</sup>Center for Oral Biology, University of Rochester Medical Center, Rochester, NY

9 <sup>3</sup>Eshelman School of Pharmacy, University of North Carolina, Chapel Hill, NC

10 <sup>4</sup>Department of Microbiology & Immunology, University of Rochester Medical Center, Rochester,  
11 NY

12 <sup>5</sup>Genomic Medicine Group, J. Craig Venter Institute, La Jolla, CA

13 <sup>6</sup>Department of Pediatrics, UC San Diego School of Medicine, La Jolla, CA

14

15 †Authors contributed equally to this manuscript

16 \*Corresponding author:

17 Jonathon L. Baker  
18 Genomic Medicine Group  
19 J. Craig Venter Institute  
20 4120 Capricorn Lane  
21 La Jolla, CA 9237  
22

23 Running Title: Acid and oxidative stress proteomes of *S. mutans*

24 Keywords: *Streptococcus mutans*, proteome, oxidative stress, Nox, TreR

25 ORCIDs: ELT: 0000-0002-0262-5253, RCF: 0000-0002-5741-4971, JLB: 0000-0001-5378-322X

26

27 **Abstract**

28 *Streptococcus mutans* promotes a tooth-damaging dysbiosis in the oral microbiota because it can  
29 form biofilms and survive acid stress better than most of its ecological competitors, which are  
30 typically health-associated. Many of these commensals produce hydrogen peroxide, therefore *S.*  
31 *mutans* must manage both oxidative stress and acid stress with coordinated and complex  
32 physiological responses. In this study, the proteome of *S. mutans* was examined during regulated  
33 growth in acid and oxidative stresses, as well as in deletion mutants with impaired oxidative stress  
34 phenotypes,  $\Delta nox$  and  $\Delta treR$ . 607 proteins exhibited significantly different abundance levels  
35 across the conditions tested, and correlation network analysis identified modules of co-expressed  
36 proteins that were responsive to the deletion of *nox* and/or *treR*, as well as acid and oxidative  
37 stress. The data provided evidence explaining the ROS-sensitive and mutacin-deficient  
38 phenotypes exhibited by the  $\Delta treR$  strain. SMU.1069-1070, a poorly understood LytTR system,  
39 had elevated abundance in the  $\Delta treR$  strain. *S. mutans* LytTR systems regulate mutacin  
40 production and competence, which may explain how TreR affects mutacin  
41 production. Furthermore, the gene cluster that produces mutanobactin, a lipopeptide important  
42 in ROS tolerance, displayed reduced abundance in the  $\Delta treR$  strain. The role of Nox as a  
43 keystone in the oxidative stress response was also emphasized. Crucially, this dataset provides  
44 oral health researchers with a proteome atlas that will enable a more complete understanding of  
45 the *S. mutans* stress responses that are required for pathogenesis, and facilitate the development  
46 of new and improved therapeutic approaches for dental caries.

47

48 **Importance**

49 Dental caries is the most common chronic infectious disease worldwide, and disproportionately  
50 affects marginalized socioeconomic groups. *Streptococcus mutans* is a considered a primary  
51 etiologic agent of caries, with its pathogenicity dependent on coordinated physiologic stress  
52 responses that mitigate the damage caused by the oxidative and acid stress common within  
53 dental plaque. In this study, the proteome of *S. mutans* was examined during growth in acidic  
54 and oxidative stresses, as well in *nox* and *treR* deletion mutants. 607 proteins were differentially  
55 expressed across the strains/growth conditions, and modules of co-expressed proteins were  
56 identified, which enabled mapping the acid and oxidative stress responses across *S. mutans*  
57 metabolism. The presence of TreR was linked to mutacin production via LytTR system signaling  
58 and to oxidative stress via mutanobactin production. The data provided by this study will guide  
59 future research elucidating *S. mutans* pathogenesis and developing improved preventative and  
60 treatment modalities for dental caries.

61

## 62 **Observation**

63 Dental caries remains the most common chronic infectious disease worldwide, and is caused by  
64 a dysbiotic dental plaque microbiome that demineralizes tooth enamel via the fermentation of  
65 dietary carbohydrates to acid (1). *Streptococcus mutans* is considered a primary etiologic agent  
66 of caries due to its exceptional ability to facilitate biofilm formation when provided with sucrose,  
67 and its acidophilic niche (2). *S. mutans* employs a robust acid stress response that renders it  
68 more acid-tolerant than many of the health-associated commensals that it competes with  
69 ecologically. A number of these rival Streptococci produce H<sub>2</sub>O<sub>2</sub>, therefore *S. mutans* must also  
70 deal with oxidative stress (3, 4). Numerous studies have examined the role of various genes in  
71 these overlapping stress responses and the complex regulatory network that governs  
72 them. Previously, our research group identified that the NADH oxidase, Nox, was a linchpin of  
73 the *S. mutans* oxidative stress response at the intersection of two oxidative stress regulons  
74 (4). Furthermore, the transcriptional regulator of the trehalose utilization operon, TreR, had an  
75 unexpected role in oxidative stress and toxin production (5). In this study, mass spectrometry  
76 was used to elucidate changes in the *S. mutans* proteome during growth in acid or oxidative  
77 stresses, and upon deletion of *nox* or *treR*.

78 The archetype *S. mutans* strain, UA159 (6), along with the  $\Delta nox$  and  $\Delta treR$  mutant strains  
79 were analyzed during tightly-controlled steady-state growth conditions enabled by chemostats set  
80 at neutral pH (7), acidic pH (5) and/or sparged with air to maintain an 8.4% dissolved oxygen  
81 concentration (i.e. oxidative stress, as described in (4)). Text S1 contains a full description of the  
82 materials and methods used in this study. Liquid chromatography-tandem mass spectrometry  
83 was performed to examine the proteome of these strains and growth conditions. 1,384 unique  
84 proteins were detected across the 8 strains/growth conditions (Table S1). PCA analysis indicated  
85 three main clusters of samples: all pH 5 samples, regardless of oxidative stress or genotype; the  
86 pH 7 samples without oxidative stress (UA159 and  $\Delta treR$ ); and the pH 7 samples under oxidative  
87 stress (UA159 + air and  $\Delta nox$ ) (Figure 1A). The proteins that were the largest drivers in ordination

88 space towards the pH 5 samples were SpaP, GtfC, GtfD, SMU\_63c, while GbpB and AdhE were  
89 associated with the pH 7 samples, and Pfl and AtlA were associated with the pH 7 samples under  
90 oxidative stress (Figure 1A). Differential expression analyses between pairwise strains/growth  
91 conditions is provided in File S1.

92 Correlation network analysis was performed to observe modules of co-expressed proteins  
93 under the various conditions (Figure 1B). This analysis revealed two large clusters of proteins  
94 associated with elevated abundance at either pH 5 or pH 7 (Figure 1D and H). Several smaller  
95 sub-clusters were associated with other discrete expression profiles such as oxidative stress or  
96 deletion of the TreR regulator (Figure 1CEFGIJK). A cluster associated with oxidative stress,  
97 either through addition of air or deletion of *nox*, included many of the well-established proteins of  
98 the oxidative stress tolerance response, including Tpx, GshR, Sod, SloR, and VicR (Figure  
99 1K). An adjacent cluster of proteins, including the Adh operon, as well as Dpr, AlsS, and much  
100 of the purine biosynthesis gene cluster, had elevated abundance at pH 7 with air, but not in  $\Delta nox$   
101 (Figure 1C).

102 Intriguingly, two sub-clusters displayed expression profiles specifically affected by the  
103 presence of the TreR regulator. DivIC and MurD, involved in cell wall synthesis and cell division,  
104 as well as the autoregulatory LytTR system, SMU.1069-1070, had increased expression in the  
105  $\Delta treR$  strain (Figure 1E). SMU.1069-1070 exhibits crosstalk with the more well-characterized  
106 LytTR systems, HdrRM and BrsRM, known to regulate competence and bacteriocin production  
107 (7, 8). Since TreR and trehalose operon expression play a role in competence (9), and the  
108 production of mutacins IV, V, and VI (5), through unknown mechanisms, signaling through  
109 SMU.1069-1070 is an attractive hypothesis. Although the mutacin IV, V, and VI NRPS products  
110 themselves are too small to be detected by the proteomics analysis employed here, further  
111 evidence linking TreR to mutacin production was observed. Several proteins within mutacin  
112 biosynthetic gene clusters (BGCs) did have significantly decreased abundance in the  $\Delta treR$  strain,

113 including CopYAZ (mutacin VI BGC) and SMU.1904 and SMU.1910 (mutacin V/CipB BGC) (File  
114 S1).

115         Meanwhile, the proteins from the trehalose operon itself, as well as the large mutanobactin  
116 BGC (SMU.1334-1349) were reduced in the  $\Delta treR$  strain (Figure 1F). This further confirmed that  
117 in *S. mutans*, TreR serves as an activator of tre operon expression, rather than as a repressor,  
118 as seen in other species (5). Mutanobactin, a non-ribosomal lipopeptide, appears to have a role  
119 in helping *S. mutans* deal with oxidative stress (10). Therefore, it is possible that reduced  
120 abundance of the mutanobactin BGC may explain the impaired ROS tolerance in the  $\Delta treR$   
121 strain. Interestingly, Nox and TreR did not appear in the correlation network, likely due to their  
122 absence in deletion mutant strains obscuring correlations. In repeated correlation analysis with  
123 the deletion mutant samples removed, Nox expression was tightly-correlated with 33 co-  
124 expressed proteins, mainly from the clusters of genes associated with oxidative stress, further  
125 confirming its role as a keystone protein in the *S. mutans* oxidative stress response (Figure  
126 2L). Contrarily, in the reanalysis, TreR only had one protein correlation with  $\rho \geq 0.8$ ,  
127 SMU\_690. Since TreR did not exhibit strong correlation with other proteins, but its absence had  
128 a major effect on the abundance of a number of proteins, it seems modulation of transcriptional  
129 regulatory activity for TreR, rather than just TreR expression level, is likely to be key in its role as  
130 a regulator.

131         Differential rankings (11) were utilized to determine the proteins most associated with acid  
132 and oxidative stress. KOs from the sub-clusters associated with pH 5 and pH 7 (Figures 1D and  
133 1H) made up the majority of the proteins associated with the cognate pH (Figure 2A), while  
134 proteins from the sub-clusters associated with oxidative stress (Figures 1C and 1K) were in fact  
135 correlated with the associated growth condition, based on supervised methods (Figure 2B). To  
136 further examine the impact of the genotypes and growth conditions on *S. mutans* metabolism,  
137 proteins with associated KO numbers from the sub-clusters in Figure 1C-J were overlaid onto a  
138 map of the metabolism of *S. mutans* UA159 using KEGG Mapper (<https://www.genome.jp/kegg/>)

139 (Figure 2). Table S3 provides a table of KO numbers and colors to be used by the reader to  
140 generate an interactive version of the metabolic map shown in Figure 2C using KEGG Mapper  
141 Color. Many of the large-scale trends observed were in-line with previous, transcriptomic and  
142 proteomic observations (3, 12). These included increased abundance of proteins involved in fatty  
143 acid biosynthesis, the partial TCA cycle and pyrimidine metabolism at pH 7, and increased  
144 abundance of proteins involved in arginine deiminase, BCAA biosynthesis, purine metabolism,  
145 and the F<sub>1</sub>F<sub>0</sub> ATPase at pH 5. Overall, this updated perspective of the *S. mutans* proteome  
146 provides a comprehensive interpretation of how this organism deals with acid and oxidative  
147 stress, permitting its key role in the dysbiosis that leads to caries pathogenesis. This study also  
148 highlights several principal avenues for future research, including the importance of the TreR  
149 regulator.  
150

151 **Data Availability**

152 The raw mass spectrometry output files are available in the MassIVE Repository  
153 (massive.ucsd.edu) with the accession number MSV000088252.

154



155 **Figure Legends**

156

157 **Figure 1: The proteome of *S. mutans* during acid and oxidative stress. (A)** PCoA biplot of  
158 the Bray-Curtis dissimilarity between samples of the indicated strain and growth condition,  
159 represented by the colored spheres. Feature loadings (i.e. proteins driving distances in ordination  
160 space) are illustrated by the vectors, which are labeled with the cognate feature name and colored  
161 based on that feature's cluster in Panel B. **(B)** Clustering of *S. mutans* proteins into co-expression  
162 clusters. Protein association network illustrating co-expressed proteins. Prior to clustering,  
163 proteins were filtered for significant differences using an uncorrected ANOVA  $p < 0.01$  (607  
164 proteins). Correlations (edges) with a Spearman's  $\rho > 0.8$  are shown and only positive  
165 correlations were considered. Edge width is representative of Spearman's  $\rho$ . Clusters were  
166 manually selected as indicated by the node color. **(C-K)** Sub-clusters are annotated with a  
167 heatmap indicating protein abundance across the 8 strains/growth conditions. Heatmap rows are  
168 clustered by Spearman's  $\rho$ . A version of the full network with each node labeled is available in  
169 Figure S1, and versions of the Acid Stress and Neutral pH heatmaps with each row labeled are  
170 available in Figure S2. A pairwise correlation table of all proteins is provided in Table S2. A  
171 heatmap illustrating expression of the 54 proteins that were differentially expressed based on  
172 ANOVA, but did not have significant correlations with other proteins, is provided in Figure S3. **(L)**  
173 Proteins that correlate with Nox when the  $\Delta nox$  samples are not included in the network  
174 analyses. The  $\Delta nox$  strain data likely obscured proteins that correlate with Nox, therefore the  
175 correlation network analysis was repeated without the  $\Delta nox$  data. The network shown here is a  
176 sub-cluster of all 33 proteins significantly correlating with Nox expression. Nox is represented by  
177 the yellow diamond, all other nodes are colored by the sub-cluster determined in Figure 1B-  
178 K. Edge is representative of Spearman's  $\rho$ . Only positive correlations with  $\rho > 0.8$  are shown.

179

180

181 **Figure 2: Metabolic modules of the *S. mutans* acid and oxidative stress responses. (A)**

182 Differential ranking of proteins associated with pH 5 vs pH 7. Songbird was used to rank proteins  
183 with respect to pH, and Qurro (13) was used to visualize the resulting ranks (only the top and  
184 bottom 150 proteins are shown). Proteins with known KOs in the sub-clusters shown in Figures  
185 1D and 1H are highlighted in orange and dark green, respectively. **(B)** Differential ranking of  
186 proteins associated with high O<sub>2</sub> (UA159 + air and  $\Delta nox$ ) vs. low O<sub>2</sub> (UA159 and  $\Delta treR$ ). Songbird  
187 was used to rank proteins with respect to high vs low O<sub>2</sub>, and Qurro (13) was used to visualize the  
188 resulting ranks (only the top and bottom 150 proteins are shown). Proteins with known KOs in  
189 the sub-clusters shown in Figures 1C and 1K are highlighted in yellow and light green,  
190 respectively. **(C)** Metabolism of *S. mutans* during acid and oxidative stress. All proteins from the  
191 sub-clusters shown in Figure 1C-K with known KOs were overlaid on to a map of the known  
192 metabolism of *S. mutans* using KEGG Mapper (<https://www.genome.jp/kegg>). Colors of each  
193 sub-cluster from Figure 1 are maintained, as described in the Key.

194

195 **Supplemental Figure and File Legends**

196

197 **Figure S1: Correlation network of the *S. mutans* proteome.** The complete Figure 1B network,  
198 with each node is labeled with the cognate protein name. Clustering of *S. mutans* proteins into  
199 co-expression clusters. Protein association network illustrating co-expressed proteins. Prior to  
200 clustering, proteins were filtered for significant differences using an uncorrected ANOVA  $p < 0.01$   
201 (607 proteins). Correlations (edges) with a Spearman's  $\rho > 0.8$  are shown and only positive  
202 correlations were considered. Edge width is representative of Spearman's  $\rho$ . Clusters were  
203 manually selected as indicated by the node color.

204

205 **Figure S2: Expression profiles of proteins associated with pH 5 (A) or pH 7 (B).** These are  
206 expanded versions of the heatmaps appearing in Figure 1 panels D and H, with each row  
207 labeled. Rows are clustered by Spearman's  $\rho$ .

208

209 **Figure S3: Expression profile of differentially-expressed genes that had no significant**  
210 **correlations.** Heatmap showing the expression of proteins that made the differential expression  
211 ANOVA  $p \geq 0.5$  cutoff, but did not have any correlations with other proteins with a Spearman's  $\rho$   
212  $\geq 0.8$ . Rows are clustered by Spearman's  $\rho$ .

213

214 **Table S1: Normalized abundances of detected proteins**

215

216 **Table S2: Spearman's Rank correlations between differentially-expressed proteins.**

217

218 **Table S3: KO and color list to generate interactive *S. mutans* metabolism map using KEGG**

219 **Mapper – Color** (<https://www.genome.jp/kegg/mapper/color.html>)

220

221 **File S1: Excel file containing pairwise log<sub>2</sub> fold-changes and p-values for each protein**  
222 **between all 8 strain/growth conditions**

223

224 **Text S1: Supplemental Materials and Methods**

225

226

227 **Acknowledgements**

228

229 The authors thank Kevin Welle and the Mass Spectrometry Resource Lab at the University of

230 Rochester Medical Center for performing the proteomics analysis. This study was supported by

231 NIH/NIDCR grants R01-DE013683 (R.G.Q.) and K99-DE029228 (J.L.B.).

232

## 233 References

- 234 Pitts NB, Zero DT, Marsh PD, Ekstrand K, Weintraub JA, Ramos-Gomez F, Tagami J, Twetman  
235 S, Tsakos G, Ismail A. 2017. Dental caries. *Nat Rev Dis Primers* 3:17030.
- 236 Lemos JA, Palmer SR, Zeng L, Wen ZT, Kajfasz JK, Freires IA, Abranches J, Brady LJ. 2019.  
237 The Biology of *Streptococcus mutans*. *Microbiol Spectr* 7.
- 238 Baker JL, Faustoferri RC, Quivey RG, Jr. 2017. Acid-adaptive mechanisms of *Streptococcus*  
239 *mutans*-the more we know, the more we don't. *Mol Oral Microbiol* 32:107-117.
- 240 Baker JL, Derr AM, Karuppaiah K, MacGilvray ME, Kajfasz JK, Faustoferri RC, Rivera-Ramos I,  
241 Bitoun JP, Lemos JA, Wen ZT, Quivey RG, Jr. 2014. *Streptococcus mutans* NADH oxidase lies  
242 at the intersection of overlapping regulons controlled by oxygen and NAD<sup>+</sup> levels. *J Bacteriol*  
243 196:2166-77.
- 244 Baker JL, Lindsay EL, Faustoferri RC, To TT, Hendrickson EL, He X, Shi W, McLean JS,  
245 Quivey RG, Jr. 2018. Characterization of the trehalose utilization operon in *Streptococcus*  
246 *mutans* reveals that the TreR transcriptional regulator is involved in stress response pathways  
247 and toxin production. *J Bacteriol* 200.
- 248 Ajdic D, McShan WM, McLaughlin RE, Savic G, Chang J, Carson MB, Primeaux C, Tian R,  
249 Kenton S, Jia H, Lin S, Qian Y, Li S, Zhu H, Najar F, Lai H, White J, Roe BA, Ferretti JJ. 2002.  
250 Genome sequence of *Streptococcus mutans* UA159, a cariogenic dental pathogen. *Proc Natl*  
251 *Acad Sci U S A* 99:14434-9.
- 252 Zou Z, Qin H, Brenner AE, Raghavan R, Millar JA, Gu Q, Xie Z, Kreth J, Merritt J. 2018. LytTR  
253 Regulatory Systems: A potential new class of prokaryotic sensory system. *PLoS Genet*  
254 14:e1007709.
- 255 Xie Z, Okinaga T, Niu G, Qi F, Merritt J. 2010. Identification of a novel bacteriocin regulatory  
256 system in *Streptococcus mutans*. *Mol Microbiol* 78:1431-47.
- 257 Underhill SAM, Shields RC, Burne RA, Hagen SJ. 2019. Carbohydrate and PepO control  
258 bimodality in competence development by *Streptococcus mutans*. *Mol Microbiol* 112:1388-1402.
- 259 Wu C, Cichewicz R, Li Y, Liu J, Roe B, Ferretti J, Merritt J, Qi F. 2010. Genomic island TnSmu2  
260 of *Streptococcus mutans* harbors a nonribosomal peptide synthetase-polyketide synthase gene  
261 cluster responsible for the biosynthesis of pigments involved in oxygen and H<sub>2</sub>O<sub>2</sub> tolerance. *Appl*  
262 *Environ Microbiol* 76:5815-26.
- 263 Morton JT, Marotz C, Washburne A, Silverman J, Zaramela LS, Edlund A, Zengler K, Knight R.  
264 2019. Establishing microbial composition measurement standards with reference frames. *Nat*  
265 *Commun* 10:2719.
- 266 Len ACL, Harty DWS, Jacques NA. 2004. Proteome analysis of *Streptococcus mutans*  
267 metabolic phenotype during acid tolerance. *Microbiology (Reading)* 150:1353-1366.
- 268 Fedarko MW, Martino C, Morton JT, Gonzalez A, Rahman G, Marotz CA, Minich JJ, Allen EE,  
269 Knight R. 2020. Visualizing 'omic feature rankings and log-ratios using Qurro. *NAR Genom*  
270 *Bioinform* 2:lqaa023.

**A**

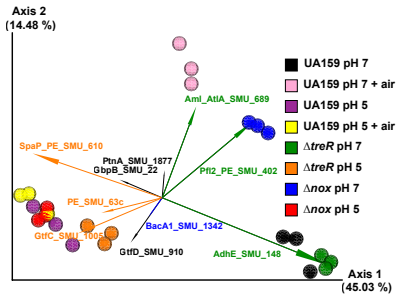

**K Oxidative stress (air &  $\Delta nox$ )**

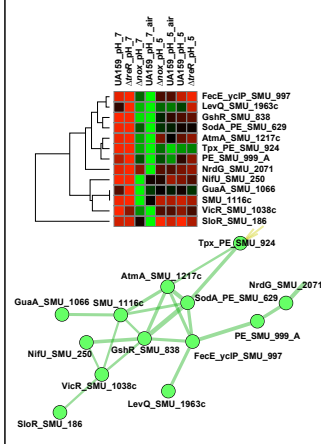

**J Misc**

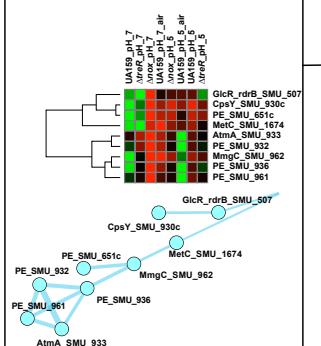

**L Nox correlation network**

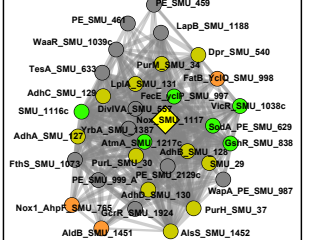

**C Oxidative stress (air only)**

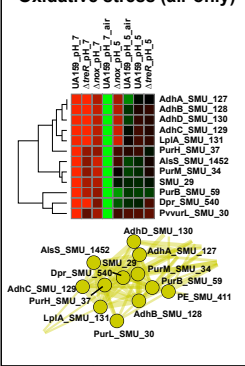

**D Acid stress**

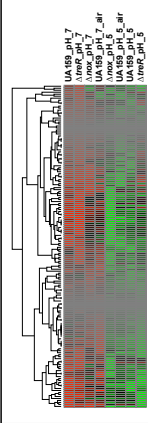

**E  $\Delta treR$  (up)**

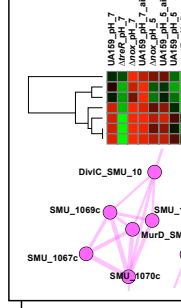

**F  $\Delta treR$  (down)**

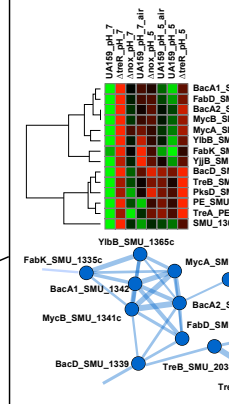

**B**

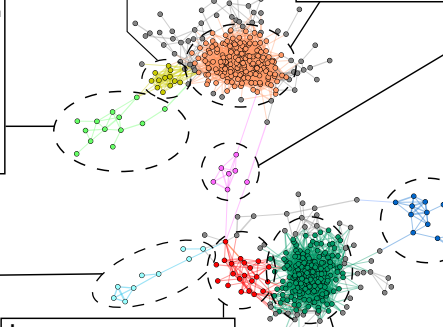

**I No stress (replication & transcription)**

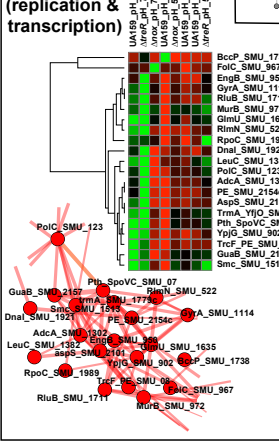

**H Neutral pH**

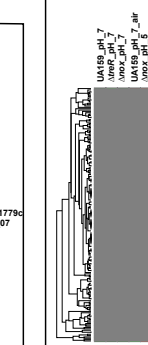

**G Misc**

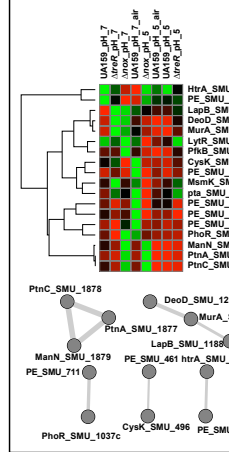



Figure 2

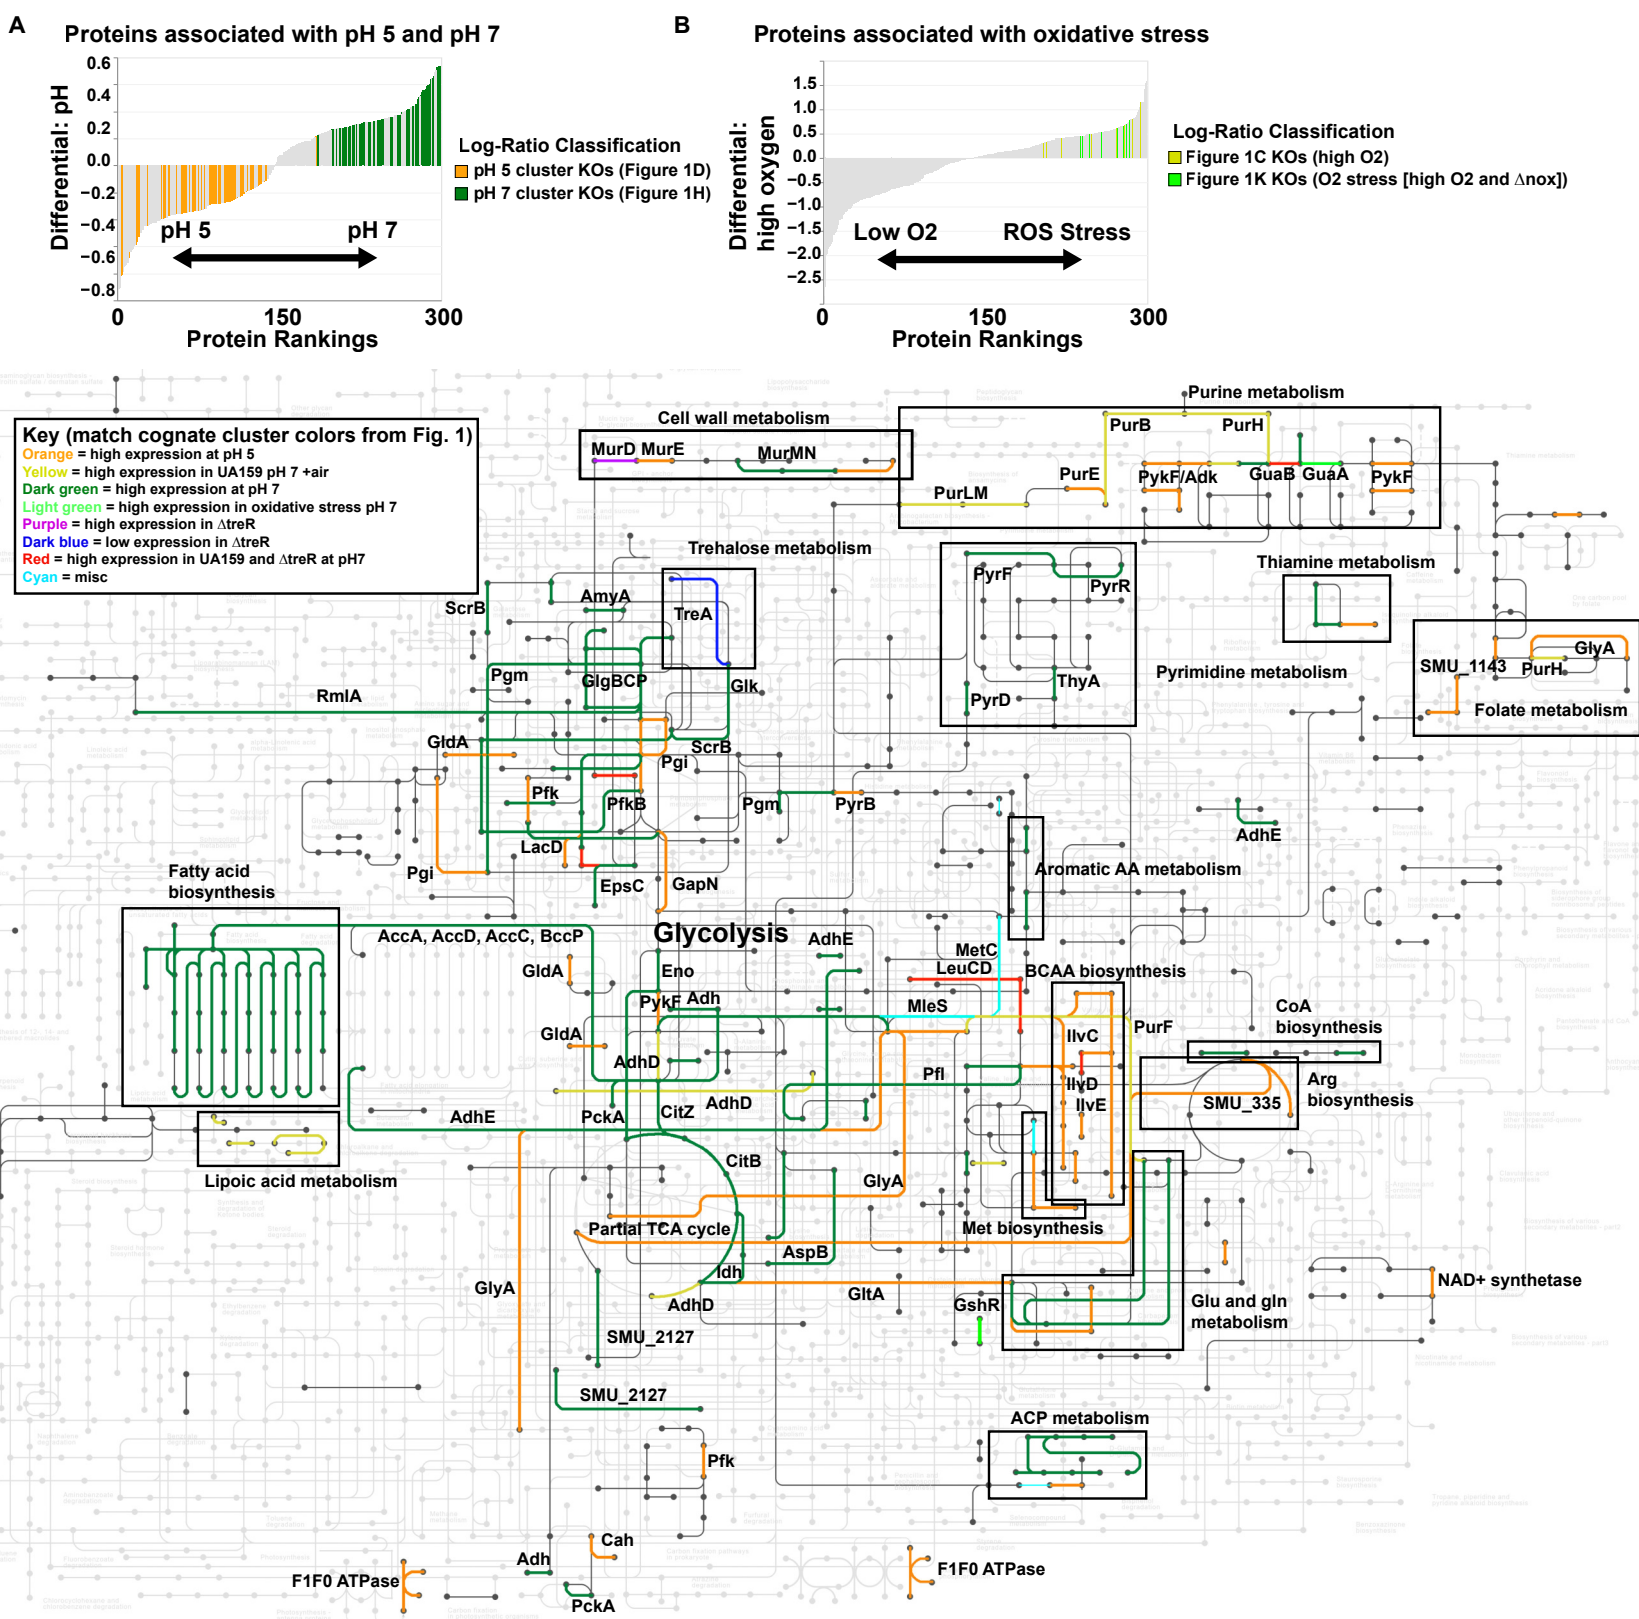

Source: https://www.biorxiv.org/content/biorxiv/early/2021/10/26/2021.10.25.465825.full.pdf
